1 **Investigating the interaction between inter-locus and intra-locus sexual conflict using**  
2 **hemiclonal analysis in *Drosophila melanogaster***

3 **Abstract:**

4 Divergence in the evolutionary interests of males and females leads to sexual conflict.  
5 Traditionally, sexual conflict has been classified into two types: inter-locus sexual conflict  
6 (IeSC) and intra-locus sexual conflict (IaSC). IeSC is modeled as a conflict over outcomes of  
7 intersexual reproductive interactions mediated by loci that are sex-limited in their effects. IaSC is  
8 thought to be a product of selection acting in opposite directions in males and females on traits  
9 with a common underlying genetic basis. While in their canonical formalisms IaSC and IeSC are  
10 mutually exclusive, there is growing support for the idea that the two may interact. Empirical  
11 evidence for such interactions, however, is limited. Here, we investigated the interaction between  
12 IeSC and IaSC in *Drosophila melanogaster*. Using hemiclonal analysis, we sampled 39  
13 hemigenomes from a laboratory-adapted population of *D. melanogaster*. We measured the  
14 contribution of each hemigenome to adult male and female fitness at three different intensities of  
15 IeSC, obtained by varying the operational sex-ratio. Subsequently, we estimated the intensity of  
16 IaSC at each sex-ratio by calculating the intersexual genetic correlation for fitness and the  
17 proportion of sexually antagonistic fitness-variation. Our results indicate a statistically non-  
18 significant trend suggesting that increasing the strength of IeSC ameliorates IaSC in the  
19 population.

20 **Keywords:**

21 Sex-ratio, sexually antagonistic coevolution, intersexual genetic correlation for fitness, sexual  
22 antagonism

23

## INTRODUCTION

24 Defined for the first time in 1979 (G. A. Parker, 1979), the term “sexual conflict” is typically  
25 used to describe situations which exhibit a negative covariance for fitness between the sexes, i.e.,  
26 circumstances that are optimal for the fitness of one sex but detrimental to the fitness of the other  
27 sex (Schenkel et al., 2018). Examples of sexual conflict encompass a wide range of organisms  
28 and traits. They include body size (Stulp et al., 2012), immunocompetence (Sharp & Vincent,  
29 2015; Svensson et al., 2009; Vincent & Sharp, 2014), parental investment (McNamara & Wolf,  
30 2015; Székely, 2014), sex-ratios and sex-allocation (Macke et al., 2014), mating behavior  
31 (Culumber et al., 2020), sperm competition (Nandy et al., 2013), traumatic insemination  
32 (Dougherty et al., 2017), colour patterns (Price & Burley, 1994), age of maturation (Barson et al.,  
33 2015; Mobley et al., 2020) and leaf area (Delph et al., 2011) among others. Conceptually, sexual  
34 conflict has been thought to be of two kinds: Interlocus Sexual Conflict (IeSC) or Intralocus  
35 Sexual Conflict (IaSC) (Schenkel et al., 2018).

36 Typically, IeSC has been mathematically modeled as a conflict over mating rates, with male  
37 fitness increasing indefinitely with increasing mating rates, while females having an intermediate  
38 optimum mating rate (Gavrilets et al., 2001; Rowe et al., 2005). Mating rates are modeled as a  
39 function of male and female traits that are sex-limited in their expression (usually called  
40 “persistence” and “resistance” traits respectively) (but see Pennell et al. (2016)). Therefore, IeSC  
41 is a conflict between a set of loci limited to males, and a different set of loci limited to females.  
42 IeSC can also be extended to other spheres of reproductive interactions between males and  
43 females; for example, the interplay between the female reproductive tract and male ejaculate  
44 components (Sirot et al., 2015). IeSC has been reported in diverse taxa including crickets  
45 (Sakaluk et al., 2019), beetles (K. B. McNamara et al., 2020; Wilson & Tomkins, 2014),

46 flatworms (Patlar et al., 2020), snails (Daupagne & Koene, 2020; Swart et al., 2020), and even  
47 plants (Lankinen et al., 2016, 2017).

48 IaSC, on the other hand, is a consequence of males and females sharing the same gene pool  
49 while experiencing markedly different selection pressures (Schenkel et al., 2018). IaSC is usually  
50 defined for traits that have a common underlying genetic basis in males and females, but have  
51 vastly different sex-specific fitness optima (Bonduriansky & Chenoweth, 2009). At the level of a  
52 locus, IaSC arises when the allele that is favoured in males is different from the one that is  
53 favoured in females (Kidwell et al., 1977). Patterns consistent with IaSC have been reported in a  
54 wide range of organisms including guppies (Wright et al., 2018), the bank vole (Lonn et al.,  
55 2017), the collared flycatcher (Dutoit et al., 2018), the ant *Nylanderia fulva* (Eyer et al., 2019),  
56 and even human beings (Cheng & Kirkpatrick, 2016).

57 In their traditional formalisms, IaSC (which deals with traits that are shared between the sexes)  
58 and IeSC (which deals with traits that are sex-limited in their expression) are mutually exclusive  
59 phenomena. However, there have been strong arguments in favour of an interaction between  
60 IaSC and IeSC. Pennell & Morrow (2013) argued that IaSC and IeSC could interact in several  
61 ways, primarily as a consequence of traits involved in IeSC not being entirely sex-limited in their  
62 effects. Traits involved in IeSC could be genetically correlated with traits involved in IaSC.  
63 Alternatively, loci involved in IeSC could have pleiotropic effects with negative fitness  
64 consequences in the other sex (Pennell et al., 2016). Pennell et al. (2013) also pointed out that  
65 processes that resolve IaSC leading to evolution of sexual dimorphism, could trigger IeSC as a  
66 result of trait exaggeration. Empirical support for an interaction between IaSC and IeSC is  
67 sparse. Working on *Callosobruchus maculatus* isofemale lines, Berger et al. (2016) were able to  
68 show that multivariate traits associated with high male fitness were genetically associated with a

69 greater drop in line-productivities than could be explained by mate harm (an important aspect of  
70 IeSC) or IaSC independently, pointing towards concurrent operation of IaSC and IeSC.  
71 However, to the best of our knowledge, no study has yet investigated the consequences of  
72 *experimentally* manipulating the intensity of IeSC on the signal of IaSC in the population. If the  
73 assumptions of Pennell et al. (2016) are correct and the loci coding for IeSC traits have negative  
74 pleiotropic effects in the opposite sex, then experimentally strengthening IeSC would lead to a  
75 strengthening of IaSC in the population.

76 In the present study, we explored the interaction between IeSC and IaSC in a laboratory adapted  
77 population of *Drosophila melanogaster*. *D. melanogaster* is a convenient model organism to  
78 address this question as it has been at the forefront of sexual conflict research, primarily because  
79 of the tractability of long-term experimental evolution studies using *D. melanogaster*, and the  
80 development of crucial genetic tools. One such tool, hemiclinal analysis, which was first  
81 developed by Rice, (1996), enables the experimenter to sample hemigenomes from the  
82 population of interest and express them in males and females carrying random genetic  
83 backgrounds from the population (Abbott & Morrow, 2011). This allows explicit measurements  
84 of various quantitative genetic parameters such as additive genetic variances and covariances  
85 between quantitative traits, including Darwinian fitness. Using these experimental approaches,  
86 *D. melanogaster* has been widely used as a model organism to investigate the evolutionary  
87 consequences of IeSC on males and females (Holland & Rice, 1999; Wigby & Chapman, 2004;  
88 Nandy et al., 2013a; (Nandy, Gupta, et al., 2013a), quantify genetic variation for IeSC-related  
89 traits (Filice & Long, 2016; Linder & Rice, 2005), estimate the intensity of IaSC (Chippindale &  
90 Rice, 2001; Collet et al., 2016; Ruzicka et al., 2019), identify traits involved in IaSC (Long &

91 Rice, 2007) and explore sexually antagonistic fitness consequences of male-limited or female-  
92 limited evolution (Abbott et al., 2020; Lund-Hansen et al., 2020; Prasad et al., 2007).

93 To investigate the interaction between IaSC and IeSC, we sampled a panel of hemigenomes from  
94 a large laboratory adapted population of *D. melanogaster*. We measured the life-time  
95 reproductive fitness of males and females carrying each hemigenome (expressed in a large  
96 number of genetic backgrounds randomly sampled from the source population) at three different  
97 adult sex-ratios: male-biased (strong IeSC), equal (intermediate IeSC) and female-biased (weak  
98 IeSC). Manipulating operational sex-ratios has been one of the two principal techniques of  
99 experimentally changing the intensity of IeSC (Janicke & Morrow, 2018; Michalczyk et al.,  
100 2011; Nandy, Gupta, et al., 2013a; Nandy et al., 2014; Wigby & Chapman, 2004), the other  
101 being experimentally enforcing monogamy (Crudgington et al., 2010; Demont et al., 2014; Gay  
102 et al., 2011; Holland & Rice, 1999; Hosken et al., 2001; Tilszer et al., 2006). First, we examined  
103 the relationship between the contribution of each hemigenome to sex-specific fitness at each of  
104 the three adult sex ratios. Particularly, we attempted to infer if there were any interactions  
105 between hemigenome line, sex and sex ratio for fitness. Subsequently, we estimated the  
106 following two parameters corresponding to the strength of IaSC for each sex-ratio:

107 1. Male-female genetic correlation for fitness ( $r_{w,g,mf}$ ): A widely used method of estimating the  
108 intensity of IaSC (Bonduriansky & Chenoweth, 2009) with a highly negative  $r_{w,g,mf}$  thought to  
109 be indicative of strong IaSC (Connallon & Matthews, 2019).

110 2. The proportion of sexually antagonistic genetic variation (Antagonism Index or AI): A more  
111 recent method that partitions fitness-variance along sexually antagonistic and sexually  
112 concordant axes (Berger et al., 2014; Ruzicka et al., 2019).

113

## METHODS

### 114 A. Fly Populations

115 **LH:** LH is a large laboratory adapted population of *D. melanogaster*. It is a direct descendent of  
116 the LH<sub>M</sub> population used to measure  $r_{w,g,mf}$  by Chippindale & Rice (2001), and is related to the  
117 populations used by other similar studies (Collet et al., 2016; Ruzicka et al., 2019). The detailed  
118 maintenance protocol of LH has been described elsewhere (Nandy et al., 2012). Briefly, it is  
119 maintained on a 14 day discrete generation cycle on a standard cornmeal-molasses diet at 25°C,  
120 50% relative humidity, and a 12 hour: 12 hour light-dark cycle. The population consists of a total  
121 of 60 vials each containing about 150 eggs in 8-10 ml food. On the 12<sup>th</sup> day post egg collection,  
122 by which time all individuals develop into adult flies, the population is randomly divided into 6  
123 groups of 10 vials each. Flies from each group are mixed together in a flask and subsequently,  
124 using light CO<sub>2</sub> anesthesia, are sorted into 10 food-vials, each containing 16 males and 16  
125 females. Thus, the total population size is 960 females and 960 males spread over 60 vials. Males  
126 and females are then allowed to interact for two days in presence of limiting amounts of live  
127 yeast. On the 14<sup>th</sup> day post egg-collection, flies are transferred to fresh food-vials, where they are  
128 allowed to lay eggs for 18 hours. The adult flies are then discarded and the eggs are trimmed to a  
129 density of 150 per vial. These eggs then start the next generation.

130 In our experiments, we used the LH population to sample a panel of 39 hemigenomes (see  
131 below).

132 **LHst:** LHst was established by introgressing an autosomal, recessive and benign scarlet eye-  
133 colour marker in the LH population. Its maintenance protocol is similar to that of LH, except that

134 the population size is half the population size of LH. LHst is regularly back-crossed to LH to  
135 replenish any genetic variation lost due to drift.

136 **DxLH:** The DxLH population was created by back-crossing the DxIV population (provided to us  
137 by Prof. Adam Chippindale) to the LH population for ten generations. DxLH males have a  
138 normal X chromosome and a normal Y chromosome. DxLH females have a normal Y  
139 chromosome and a compound X chromosome [C(1)DX yf]. This ensures that sons inherit their X  
140 chromosome from their father and their Y-chromosome from their mother. Both DxLH males  
141 and females have autosomes derived from LH.

142 **Clone-generators (CG):** CG males and females have a translocation between the two major  
143 autosomes [T(2;3) rdgCst in ripPbwD] (Rice, 1996). CG females have a compound X  
144 chromosome [C(1)DX yf] and a Y chromosome. Males have a Y chromosome and an X  
145 [snsu(b)] chromosome. CG females enabled us to sample entire haploid genomes (barring the  
146 “dot” chromosome 4) and maintain them indefinitely without being damaged by recombination.

## 147 **B. Sampling and Maintaining Hemigenomes**

148 We followed a protocol of sampling and maintaining hemigenomes that was similar to the one  
149 described by Abbott & Morrow (2011). We chose forty-three males from the LH population  
150 randomly. We housed them in separate food-vials with 3 CG females each. From each of the  
151 forty-three crosses, we selected one brown-eyed male offspring. Each of these brown-eyed male  
152 offspring had a unique haploid “hemigenome” from LH. We then crossed them with 3 CG  
153 females each. Absence of molecular recombination in male *D. melanogaster* and the unique  
154 features of CG females ensure that the sampled hemigenome gets passed on faithfully from sire  
155 to son without being recombined (with the exception of the “dot chromosome”). Each of these 43

156 crosses represents a unique hemigenome line. We maintained each hemigenome line  
157 subsequently by crossing 10 brown-eyed males with 20 CG females every generation. The  
158 brown-dominant and scarlet-recessive eye-colour markers on the translocation of the CG females  
159 enabled us to distinguish between males that carried the sampled hemigenomes (which were  
160 brown-eyed as they were heterozygous for the translocation) and males that were homozygous  
161 for the translocation (which were white-eyed). (See Box 2 of Abbott & Morrow (2011) for a  
162 detailed schematic.) Four hemigenome lines were lost in an accident. Therefore, we present data  
163 from 39 lines.

### 164 **C. Fitness Assays**

165 We expressed each hemigenome in males and females carrying the rest of the genome from the  
166 LH population and measured their adult fitness at male-biased (8 females: 24 males), equal (16  
167 females: 16 males) and female-biased (24 females: 8 males) sex ratios. Barring the sex-ratios, we  
168 tried to ensure that the environment of the fitness assays mimicked the typical LH environment  
169 as closely as our experiments could permit.

#### 170 **1. Female Fitness Assay:**

171 Generating experimental flies: In order to express hemigenomes from each line in females  
172 containing a random background from the LH population, we crossed brown-eyed males  
173 (heterozygous, carrying the target hemigenome and the translocation) with virgin LH females.  
174 To that end, first we collected 30 vials containing 150 eggs each from the LH population. The  
175 females emerging from these vials were collected as virgins (within 6 hours of their eclosion)  
176 with the help of mild CO<sub>2</sub> anesthesia by sorting them into vials containing 10 females each.  
177 These females were then combined with brown-eyed males from each hemigenome line. For



178 every hemigenome line we set up three to four vials, each containing 5 males from that line and  
179 10 virgin LH females. We allowed these males and females to interact for two days in presence  
180 of ad-libitum live yeast (to boost fecundity) and then transferred them to fresh food vials for  
181 oviposition for around 18 hours. After discarding the adults, we trimmed the egg-density in each  
182 vial to around 250, so that the expected number of larvae surviving in each vial would be around  
183 125 (half the eggs were expected to be unviable). We kept the expected larval density lower than  
184 the normal density in the LH population (around 150 per vial) in order to avoid overcrowding in  
185 vials that had higher than expected levels of survivorships. Red-eyed females emerging from  
186 these vials would be females carrying the target hemigenomes expressed in a random LH  
187 background. We refer to these as “focal females”. In order to generate males and competitor  
188 females for the assay, we also collected 100 vials of 150 eggs each from the LHst population on  
189 the day the eggs from the crosses were trimmed. This ensured that on the day of the experiment  
190 all experimental flies were of the same age.

191 Fitness assay: We collected focal females (red-eyed female progeny emerging from the crosses  
192 described above) as virgins using light CO<sub>2</sub> anesthesia and held them in food-vials at a density of  
193 8 females per vial. On the 12<sup>th</sup> day post egg collection we set up adult competition food-vials  
194 supplemented by 100 µL of live- yeast suspension in water. The concentration of the yeast  
195 suspension was adjusted according to the sex-ratio treatment such that the per-female yeast  
196 availability in the vial was always 0.47 mg. In these adult competition vials, we combined the  
197 focal females with competitor LHst females and LHst males at appropriate numbers depending  
198 on the sex-ratio treatment. Regardless of the sex-ratio treatment, the total number of flies (males  
199 + females) in a vial was always 32, and the ratio of focal females to competitor females was  
200 always 1:3. For the male-biased sex-ratio, each vial had 24 LHst males, 2 focal females and 6

201 LHst competitor females. The equal sex ratio had 16 LHst males, 4 focal females and 12 LHst  
202 competitor females in each vial. The female biased sex-ratio had 8 LHst males, 6 focal females  
203 and 18 LHst competitor females. We allowed males and females to interact in the adult  
204 competition vials for two days. Subsequently, from each vial (regardless of the sex-ratio) we  
205 transferred two focal females to a fresh food-vial for egg-laying. We discarded these females  
206 after 18 hours and counted the eggs laid in that period, which was used as a measure of the  
207 fitness of the focal females in that vial. We performed two replicate assays for each of the sex-  
208 ratios, all on separate days. For each replicate assay of each sex-ratio we set up 7 adult  
209 competition vials for every hemigenome family. However, due to experimental contingencies, in  
210 some cases we had to set up fewer than 7 adult competition vials for some hemigenome lines.

## 211 **2. Male Fitness Assay:**

212 Generating experimental flies: The protocol for generating flies for the male fitness assay was  
213 similar to the female fitness assay, except that instead of crossing brown-eyed males from each  
214 hemigenome line to LH females, we crossed them to virgin DxLH females. This ensured that the  
215 red-eyed male progeny emerging from these crosses (the “focal males”) had the target  
216 hemigenomes expressed in a random background from the LH population. The eggs laid in the  
217 crosses between brown-eyed males from each line and DxLH females were trimmed to a density  
218 of around 500 so as to ensure the larval density would be around 125. We also collected 100  
219 vials of 150 eggs each from the LHst population to generate competitor males and females for  
220 the fitness assay.

221 Fitness assay: The design of the male fitness assay mirrored that of the female fitness assay. We  
222 collected focal males (red-eyed male progeny emerging from the crosses described above) as

223 virgins in food-vials in groups of 8. We also collected as virgins LHst females in groups of 8 per  
224 food-vial and competitor LHst males in groups of 6 per vial. On the 12<sup>th</sup> day post-egg collection  
225 we set up adult competition vials as described for the female-fitness experiment. We then  
226 combined focal males, competitor LHst males and LHst females in the adult competition vials in  
227 appropriate numbers based on the sex-ratio (Male-biased: 6 focal males, 18 LHst competitor  
228 males, 8 LHst females; Equal: 4 focal males, 12 LHst competitor males, 16 LHst females;  
229 Female-biased: 2 focal males, 6 LHst competitor males, 24 LHst females). We let the flies  
230 interact in the adult competition vials for two days. On the 14<sup>th</sup> day post egg collection, from  
231 each vial we transferred 7 randomly chosen LHst females individually into separate test-tubes  
232 containing food for oviposition. After 18 hours, we discarded the females and incubated the test  
233 tubes in standard maintenance conditions. Twelve days later, when all progeny in the test tubes  
234 had developed into adults we froze the test-tubes at -20°C. We scored the progeny from each  
235 test-tube for their eye colour. The proportion of red-eyed progeny among all the progeny from  
236 the 7 test tubes corresponding to a vial was used as the measure of the fitness of focal males from  
237 that vial. For males too, we performed two replicate assays for each of the sex-ratio-treatments,  
238 with all six assays being set up separately. Within each assay, for every sex-ratio treatment, we  
239 set up 5 adult competition vials for every hemigenome family. In some cases, there were fewer  
240 than 5 adult competition vials.

## 241 **STATISTICAL ANALYSIS**

242 All analyses were performed in R version 4.0.2.

243 In order to examine if there was a significant effect of hemigenome line and its interaction with  
244 sex and sex ratio, we used the R packages “lme4” and “lmerTest” to fit the following linear

245 mixed effects model on male and female fitness data scaled and centred separately for each day  
246 of the experiment:

247 Standardised Fitness  $\sim$  Sex + Sex.Ratio + Sex:Sex.Ratio + (1|Family) + (1|Family:Sex) +  
248 (1|Family:Sex.Ratio) + (1|Family:Sex:Sex.Ratio).

249 In order to calculate the  $r_{w,g,mf}$  we calculated the mean fitness associated with hemigenome line  
250 in both males and females. To that end first we arcsin-square-root transformed the male fitness  
251 data for each adult competition vial. We divided the data for each day by the mean fitness of that  
252 day. Since, we had performed two replicate fitness assays for each sex-ratio with multiple  
253 measurements on each day, we calculated the average fitness for hemigenome lines for each sex-  
254 ratio in two steps. For both males and females, for each sex ratio, we first calculated the average  
255 fitness for each hemigenome line on each of the two replicate days and then calculated the  
256 average of the two averages. We then scaled and centered the data for each sex  $\times$  sex-ratio  
257 combination separately. First, we used this data to calculate genetic correlations for sex-specific  
258 fitness across sex ratios. We then calculated the intersexual genetic correlation for fitness ( $r_{w,g,mf}$ )  
259 for each sex-ratio. Following Berger et al. (2014) and Ruzicka et al. (2019), we also calculated  
260 the proportion of fitness variation along the sexually antagonistic axis by rotating our original  
261 coordinate system represented by a female fitness axis (X-axis) and a male fitness axis (Y-axis)  
262 by  $45^\circ$  in the anti-clockwise direction. As a result of this transformation the new X-axis is the  
263 axis of sexually concordant fitness variation, while the new Y-axis is the axis of sexually  
264 antagonistic fitness variation. We used the following matrix operation separately for the scaled  
265 and centered data for each sex-ratio: 
$$\begin{pmatrix} \bar{W}_{C,i} \\ \bar{W}_{A,i} \end{pmatrix} = \begin{pmatrix} 1/\sqrt{2} & 1/\sqrt{2} \\ -1/\sqrt{2} & 1/\sqrt{2} \end{pmatrix} \begin{pmatrix} \bar{W}_{F,i} \\ \bar{W}_{M,i} \end{pmatrix},$$
 where  $\bar{W}_{C,i}$   
266 and  $\bar{W}_{A,i}$  are the sexually concordant and sexual antagonistic fitness components respectively for

267 the hemigenome line  $i$  for that sex ratio, and  $\bar{W}_{F,i}$  and  $\bar{W}_{M,i}$  are the average female and male  
268 fitnesses respectively for the hemigenome line  $i$  for that sex ratio. We then calculated an  
269 “antagonism index” (AI) defined by the proportion of variance in fitness lying along the sexually  
270 antagonistic axis for each sex ratio.

271 In order to calculate 95% confidence intervals around our estimates of across sex ratio  
272 correlations for sex-specific fitness,  $r_{w,g,mf}$  and AI we used a stratified bootstrap approach using  
273 the R package “boot” (Canty et al., 2010). For each sex-ratio, we created 10000 data-sets by  
274 sampling with replacement within each sex  $\times$  hemigenome line  $\times$  day combination. This  
275 procedure ensured that each of the bootstrapped data-sets had representation from each sex  $\times$   
276 hemigenome line  $\times$  day combination in the same proportions as the original data-set. We also  
277 calculated 95% confidence intervals for differences between  $r_{w,g,mf}$  and AI estimates of male-  
278 biased and female-biased sex ratios to test if they included 0.

279 Following Ruzicka et al. (2019), we used the R package “MCMCglmm” (Hadfield, 2010) to fit a  
280 Bayesian linear mixed effects model using Monte Carlo sampling methods to estimate across sex  
281 ratio correlations for sex-specific fitness,  $r_{w,g,mf}$  and male and female heritabilities for each sex-  
282 ratio separately. We first scaled and centered arcsin-squareroot transformed male fitness data and  
283 female fitness data separately for each day. We fit the following model for each sex-ratio:  $W_{ijkmn}$   
284  $\sim S_i + R_j + S.R_{ij} + L_{ijk} + D.L_{km} + \epsilon_{ijkmn}$ , where  $W_{ijkmn}$  is the scaled and centered fitness of adult-  
285 competition vial  $n$  of sex  $i$ , sex ratio  $j$ , and hemigenome line  $k$  on day  $m$ .  $S_i$ ,  $R_j$  and  $S.R_{ij}$  represent  
286 the fixed effects of sex, sex ratio and their interaction.  $L_{ijk}$  represents a term corresponding to the  
287 sex-specific random effect of each hemogenome line for sex ratio  $j$ .  $D.L_{km}$  represents a scalar  
288 corresponding to the random interaction of day and hemigenome line.  $L_{ijk}$  is modeled to follow a  
289 multivariate normal distribution with a mean 0, and whose variance-covariance matrix is given

290 by the additive genetic variance in female fitness ( $\sigma^2_{w,g,f}$ ), and male fitness ( $\sigma^2_{w,g,m}$ ) in each of  
 291 the three sex ratios; the intersexual genetic covariance for fitness ( $Cov_{w,g,mf}$ ) for each of the  
 292 three sex ratios; as well as sex-specific genetic covariances for fitness between male biased and  
 293 female biased sex ratio ( $\sigma^2_{w,g,mb-fb}$ ), between male biased and equal sex ratio ( $\sigma^2_{w,g,mb-e}$ ),  
 294 and between female biased and equal sex ratio ( $\sigma^2_{w,g,e-fb}$ ); along with other terms  
 295 corresponding to genetic covariances for fitness across sex and sex ratios both.  $\varepsilon_{ijkmn}$  represents  
 296 the sex and sex-ratio specific residuals.  $\varepsilon_{ijkmn}$  is modeled to follow a normal distribution with a  
 297 mean 0 and variance given by the sex and sex-ratio specific residual fitness variance ( $\sigma^2_{w,r,m}$  for  
 298 males and  $\sigma^2_{w,r,f}$  for females for each of the three sex-ratios). We used these estimates to  
 299 calculate the following sex- or sex ratio-specific quantitative genetic parameters:

300 1. Genetic covariance for fitness between male biased and female biased sex ratio in sex  $i$ ,

301 
$$r_{w,g,mb-fb,i} = \frac{Cov_{w,g,mb-fb,i}}{\sqrt{\sigma^2_{w,g,fb,i}}\sqrt{\sigma^2_{w,g,mb,i}}}$$

302 2. Genetic covariance for fitness between male biased and equal sex ratio in sex  $i$ ,  $r_{w,g,mb-e,i} =$

303 
$$\frac{Cov_{w,g,mb-e,i}}{\sqrt{\sigma^2_{w,g,mb,i}}\sqrt{\sigma^2_{w,g,e,i}}}$$

304 3. Genetic covariance for fitness between equal and female biased sex ratio in sex  $i$ ,  $r_{w,g,e-fb,i} =$

305 
$$\frac{Cov_{w,g,e-fb,i}}{\sqrt{\sigma^2_{w,g,e,i}}\sqrt{\sigma^2_{w,g,fb,i}}}$$

306 4. Heritability for female fitness in sex ratio  $j$ ,  $h^2_{w,f,j} = \frac{\sigma^2_{w,g,f,j} \times 2}{\sigma^2_{w,r,f,j} + \sigma^2_{w,g,f,j}}$

307 5. Heritability for male fitness in sex ratio  $j$ ,  $h^2_{w,m,j} = \frac{\sigma^2_{w,g,m,j} \times 2}{\sigma^2_{w,r,m,j} + \sigma^2_{w,g,m,j}}$

308 6. Intersexual genetic correlation for fitness in sex ratio  $j$ ,  $r_{w,g,mf,j} = \frac{Cov_{w,g,mf,j}}{\sqrt{\sigma^2_{w,g,f,j}}\sqrt{\sigma^2_{w,g,m,j}}}$

309

310

## RESULTS

311 The output of our linear mixed effects model (Table 1) suggested that there was a significant  
312 effect of hemigenome line (likelihood ratio test (LRT),  $p = 0.0237$ ), its interaction with sex  
313 (LRT,  $p < 0.0001$ ), and the three-way interaction between hemigenome line, sex and sex ratio  
314 (LRT,  $p = 0.0002$ ). While all across-sex ratio correlations for both males and females, and all  
315 across-sex correlations for all three sex ratios were positive (Table 2A-2B, Figure 1, Figure 2).  
316 many hemigenome lines exhibited fitness rank reversals across sex ratios (Figure 3) or sex  
317 (Figure 4), explaining the interactions observed in the linear mixed effects model.

318 The analyses using hemigenome line averages suggested that the  $r_{w,g,mf}$  for male-biased sex-ratio  
319 (0.3805, 95% CI = [0.2992, 0.52833]) and equal sex ratios (0.4027, 95% CI = [0.3140, 0.5526])  
320 were comparable to each other, but were larger than that for the female-biased sex-ratio (0.2515,  
321 95% CI = [0.1198, 0.4502]). The AI too was comparable for male-biased and equal sex ratios  
322 (0.3097, 95% CI = [0.2358, 0.3504] and 0.2986, 95% CI = [0.2237, 0.3430] respectively). The  
323 female-biased sex ratio had a higher AI (0.3742, 95% CI = [0.2749, 0.4401]). However, the 95%  
324 confidence intervals (CIs) for the difference in the  $r_{w,g,mf}$  estimates of male biased and female  
325 biased sex ratios (-0.0721, 0.3507) and the 95% CIs for the difference between AI estimates for  
326 male biased and female biased sex-ratios (-0.1753, 0.0360) included 0, suggesting these  
327 differences were not statistically significant.

328 The estimates of  $r_{w,g,mf}$  from the MCMCglmm model (Table 2B) were slightly higher but the  
329 relative trend among sex-ratios was similar. The  $r_{w,g,mf}$  estimates were comparable for male-  
330 biased (0.5056, 95% credible intervals (CI) = [0.1418, 0.7983]) and equal sex-ratios (0.4999,  
331 95% CI = [0.1397, 0.7787]), while the  $r_{w,g,mf}$  estimate for the female-biased sex ratio (0.4462,  
332 95% CI = [0.0059, 0.8470]) was lower (Table 2B). However, the credible interval for the  
333 difference between the  $r_{w,g,mf}$  estimates for male biased and female biased sex ratios (-0.3788,  
334 0.5561) included 0, suggesting the two were not significantly different. The estimates of female  
335 heritabilities in male biased (0.8702, 95% CI = [0.5935, 1.1520]), equal (0.9992, 95% CI =  
336 [0.7337, 1.2696]) and female-biased (0.7385, 95% CI = [0.5021, 1.0539]) sex ratios, were higher  
337 than the corresponding estimates of male heritabilities at male biased (0.4788, 95% CI = [0.2383,  
338 0.7303]), equal (0.5762, 95% CI = [0.3192, 0.8637]) and female biased (0.2229, 95% CI =  
339 [0.0495, 0.4080]) sex ratios. This trend was statistically significant, as the 95% credible intervals  
340 for the difference in female and male heritabilities did not overlap with 0 in male biased [-  
341 0.7343, -0.0207] and equal [-0.7703, -0.0852] sex ratios, but not in the female biased sex ratio [-  
342 0.3740, 0.0668]. Additionally, for both males and females, equal sex-ratio had the highest  
343 heritabilities, with the male-biased sex-ratio having marginally lower heritabilities. Both male  
344 and female heritabilities were considerably lower in the female-biased sex-ratio. The variance  
345 estimate for the interaction between day and hemigenome line was 0.0353 (95% CI = [0.0068,  
346 0.0606]).

## 347 **DISCUSSION**

348 We investigated the interaction between inter- and intra-locus sexual conflict in a laboratory  
349 adapted population of *D. melanogaster*. We isolated 39 hemigenomes from the LH population  
350 and measured the contribution of each hemigenome to the adult lifetime fitness of males and



351 females at male-biased, equal and female-biased sex-ratios. Our analyses yielded the following  
352 major findings:

353 (a) At each sex-ratio the intersexual genetic correlation for fitness ( $r_{w,g,mf}$ ) was positive.  $r_{w,g,mf}$   
354 was smaller and the antagonism index (AI) higher in the female-biased sex-ratio relative to male-  
355 biased or equal sex ratios, suggesting an amelioration of IaSC at higher intensities of IeSC.

356 However, it must be noted that these differences were not statistically significant.

357 (b) Genetic correlations across sex ratios for male and female fitness were strongly positive.

358 (c) There were significant hemigenome line  $\times$  sex, and hemigenome line  $\times$  sex  $\times$  sex ratio  
359 interactions for standardized fitness.

360 (d) Heritabilities for fitness were the highest in the equal sex ratio, followed by the male biased  
361 sex ratio, and were considerably lower in the female-biased sex-ratio.

362 (e) Estimates of female heritabilities in all three sex ratios were higher than the corresponding  
363 estimates of male heritabilities consistent with previous studies on similar systems (Chippindale  
364 & Rice, 2001; Innocenti & Morrow, 2010; Collet et al., 2016; Ruzicka et al., 2018).

365 Below, we discuss some implications of these findings.

366 Pennell & Morrow (2013) argued that one of the ways in which IaSC and IeSC could interact is  
367 if one relaxes the assumption that the loci involved in IeSC are sex-limited in their effects. They  
368 pointed out that if traits involved in IeSC have pleiotropic effects in the other sex with negative  
369 fitness consequences IaSC could ensue. As a corollary, if one experimentally increases the  
370 strength of IeSC in the population, all else being equal, the degree of sexually antagonistic  
371 selection (relative to sexually concordant selection) should increase as well. We found no

372 evidence in favour of this prediction. On the contrary, our results suggest a statistically non-  
373 significant trend in the opposite direction.

374 Both IaSC and IeSC are complex biological phenomena that involve an interplay of a large  
375 number of traits. To be able to predict how changing the intensity of one influences the intensity  
376 of the other would, therefore, require an understanding of the genetic correlations between the  
377 various traits involved in IaSC and IeSC, and nature of selection acting on each of these traits  
378 under different intensities of these conflicts. Below, we describe two plausible scenarios under  
379 which strengthening the intensity of IeSC could lead to weaker IaSC within the population.

380 First, as the intensity of IeSC increases, it is possible that selection gradients on traits involved in  
381 IaSC change, leading to a change in the intensity of IaSC over those traits. In an extreme  
382 scenario, with increase in the strength of IeSC, one of these selection gradients could change  
383 signs in one of the sexes resulting in sexually concordant selection on that trait. Given that we  
384 found a strong three-way interaction between sex, sex ratio, and hemigenome line for fitness, in  
385 our linear mixed effects model, this explanation becomes fairly plausible. Below, we use  
386 available results about locomotory activity to illustrate our point. Adult locomotory activity has  
387 been shown to mediate IaSC in *D. melanogaster* (Long & Rice, 2007), with more active males  
388 and less active females enjoying higher fitness. Numerous studies have reported patterns that  
389 indicate that *D. melanogaster* males that tend to be more active enjoy greater mating success  
390 (Hall, 1994; Jordan et al., 2006; Partridge et al., 1987; van Dijken & Scharloo, 1979). On the  
391 other hand, female activity stimulates male courtship in *D. melanogaster* (Tompkins et al.,  
392 1982). Therefore, active females are thought to attract more courtship from males, resulting in  
393 diversion of resources away from egg-production. While a substantial fraction of fitness costs of  
394 male-female interactions to females are pre-mating (Partridge & Fowler, 1990), numerous

395 studies have highlighted post-mating fitness costs to females (Fowler & Partridge, 1989; K.  
396 Parker et al., 2013; Wigby & Chapman, 2005). Therefore, it is possible that in an environment  
397 where IeSC is intense (for example, the male-biased sex-ratio in our experiments), where male-  
398 courtship is guaranteed regardless of female activity, selection on females to reduce the number  
399 of matings might be stronger than avoiding courtship per se. As a corollary, in an environment  
400 with extremely elevated levels of male-courtship, more active females might enjoy higher  
401 fitnesses by virtue of their ability to reject male mounting attempts. Therefore, at higher  
402 intensities of IeSC, the selection on adult locomotory activity might become sexually concordant  
403 reducing the intensity of IaSC. Nandy (2012) evolved replicate populations of *D. melanogaster*  
404 at male-biased, equal and female-biased sex-ratios, and reported that both males and females  
405 from the male-biased population evolved to become more active than their counterparts evolving  
406 under equal and female-biased sex ratios (Nandy et al., 2013b). This suggests that at male-biased  
407 sex-ratio, where levels of IeSC are the highest, the IaSC over locomotory activity seems to be  
408 weakened, if not removed entirely, so as to permit the evolution of increased locomotory activity  
409 levels in both males and females.

410 Second, increasing the strength of IeSC could ameliorate IaSC if male and female traits  
411 (unfortunately called “persistence” and “resistance” traits respectively) involved in IeSC are  
412 positively genetically correlated. If the most “resistant” females preferentially mate with the  
413 most “persistent” males a positive linkage disequilibrium between “resistance” and “persistence”  
414 could build up in the population. As the strength of IeSC increases, by definition, the strength of  
415 selection on “persistence” and “resistance” traits increases. If the two sets of traits are positively  
416 genetically correlated, this would result in an increase in the strength of sexually concordant  
417 selection; all else being equal, this would yield a weakened IaSC signal. Rice et al. (2005) could

418 not find a significant correlation between male and female remating rates in a laboratory  
419 population of *D. melanogaster*. However, they did not explicitly observe mating, but measured  
420 mating rates in terms of the proportion of females in a vial that remated after their first mating.  
421 There are several alternative ways of measuring proxies of persistence and resistance including  
422 measuring the latency between the first and the second mating, explicit observations to record  
423 matings or measuring courtship related behaviours in males and females. It remains to be  
424 explored if these traits are genetically correlated in our panel of hemigenomes.

425 Our study is also relevant in the context of the “evolutionary inevitability of sexual antagonism”  
426 (Connallon & Clark, 2013). Connallon & Clark (2013) used a variant of Fisher’s geometric  
427 model to show that as populations adapt to their environments the degree of sexual antagonism  
428 in the populations should increase. Consequently, if a population that is well-adapted to its  
429 environment is exposed to a novel environment the degree of sexually antagonistic selection  
430 experienced by the population should be lower. This idea has been tested in insects by numerous  
431 studies with some studies finding evidence in support of the idea (Berger et al., 2014; Long et al.,  
432 2012), while others either failed to detect any effect of change of environment on the degree of  
433 sexual antagonism (Holman & Jacomb, 2017; Martinossi-Allibert et al., 2018) or reported an  
434 increase in sexual antagonism in novel environments (Delcourt et al., 2009; Punzalan et al.,  
435 2014). In our case the LH population has been maintained in the laboratory for >500 generations  
436 at equal sex-ratio. Therefore, male-biased and female-biased sex-ratios represent novel  
437 environments to which the population is not expected to have adapted. Our results are in stark  
438 contrast to the idea that maladapted populations should exhibit weaker IaSC. We found that  
439 compared to equal sex-ratio, male biased sex ratio exhibited a comparable intensity of IaSC,

440 while the female biased sex-ratio resulted in an *increased* strength of IaSC (lower  $r_{w,g,mf}$  and  
441 higher IA).

442 At each of the three sex-ratios our estimates of  $r_{w,g,mf}$  were strongly positive. This is in sharp  
443 contrast to (Chippindale & Rice, 2001) who had reported a negative  $r_{w,g,mf}$  in the ancestral  
444 population of the LH population used by us. In fact, several studies have attempted to estimate  
445  $r_{w,g,mf}$  in replicates of the original LH<sub>M</sub> population with different outcomes. Innocenti & Morrow  
446 (2010) reported a negative  $r_{w,g,mf}$ . Collet et al. (2016) compared  $r_{w,g,mf}$  across two replicates of the  
447 LH<sub>M</sub> population and reported that one of the replicates had a negative  $r_{w,g,mf}$  while the other had  
448 an  $r_{w,g,mf}$  indistinguishable from 0. Ruzicka et al. (2019) sampled 200 hemogenomes from a  
449 replicate of the LH<sub>M</sub> population and found a positive but non-significant  $r_{w,g,mf}$ . Ours is the first  
450 study to report an  $r_{w,g,mf}$  significantly greater than 0. While it is tempting to interpret this as  
451 evidence indicating resolution of IaSC through the traditional pathway of sex-specific  
452 expression, it might well be a byproduct of strengthening IeSC, as we have argued above.  
453 Therefore, further experimental work aimed at understanding the genetic relationships between  
454 traits involved in IaSC and IeSC, as well as their selection gradients under various environments  
455 is required.

456 In conclusion, the key findings of our study are as follows:

457 1. Strengthening the intensity of interlocus sexual conflict did not lead to an increase in the  
458 intensity of intralocus sexual conflict, contrary expectations from assumptions in the theoretical  
459 literature. We report a non-significant trend in the opposite direction.

- 460 2. In contrast with previous studies, we report significantly positive intersexual genetic  
461 correlation for fitness, except in the case of female-biased sex ratio, in which case it is  
462 indistinguishable from 0 in one of the analyses.
- 463 3. Both males and females experience stronger selection in male-biased and equal sex-ratio  
464 environments as compared to female-biased sex-ratios.

465

466

## REFERENCES

- 467 Abbott, J. K., Chippindale, A. K., & Morrow, E. H. (2020). The microevolutionary response to  
468 male-limited X-chromosome evolution in *Drosophila melanogaster* reflects  
469 macroevolutionary patterns. *Journal of Evolutionary Biology*.  
470 <https://doi.org/10.1111/jeb.13618>
- 471 Abbott, J. K., & Morrow, E. H. (2011). Obtaining snapshots of genetic variation using  
472 hemiclonal analysis. In *Trends in Ecology and Evolution*.  
473 <https://doi.org/10.1016/j.tree.2011.03.011>
- 474 Barson, N. J., Aykanat, T., Hindar, K., Baranski, M., Bolstad, G. H., Fiske, P., Jacq, C., Jensen,  
475 A. J., Johnston, S. E., Karlsson, S., Kent, M., Moen, T., Niemelä, E., Nome, T., Næsje, T.  
476 F., Orell, P., Romakkaniemi, A., Sægrov, H., Urdal, K., ... Primmer, C. R. (2015). Sex-  
477 dependent dominance at a single locus maintains variation in age at maturity in salmon.  
478 *Nature*. <https://doi.org/10.1038/nature16062>
- 479 Berger, D., Grieshop, K., Lind, M. I., Goenaga, J., Maklakov, A. A., & Arnqvist, G. (2014).  
480 Intralocus sexual conflict and environmental stress. *Evolution*.  
481 <https://doi.org/10.1111/evo.12439>

- 482 Berger, D., Martinossi-Allibert, I., Grieshop, K., Lind, M. I., Maklakov, A. A., & Arnqvist, G.  
483 (2016). Intralocus sexual conflict and the tragedy of the commons in seed beetles.  
484 *American Naturalist*. <https://doi.org/10.1086/687963>
- 485 Bonduriansky, R., & Chenoweth, S. F. (2009). Intralocus sexual conflict. In *Trends in Ecology*  
486 *and Evolution*. <https://doi.org/10.1016/j.tree.2008.12.005>
- 487 Cauty, A., Ripley, B., & Ripley, M. B. (2010). Package ‘boot’. *Methods*.
- 488 Cheng, C., & Kirkpatrick, M. (2016). Sex-Specific Selection and Sex-Biased Gene Expression in  
489 Humans and Flies. *PLoS Genetics*. <https://doi.org/10.1371/journal.pgen.1006170>
- 490 Chippindale, A. K., & Rice, W. R. (2001). Negative genetic correlation for adult fitness between  
491 sexes reveals ontogenetic conflict in *Drosophila*. *Proceedings of the National Academy of*  
492 *Sciences*. <https://doi.org/10.1073/pnas.041378098>
- 493 Collet, J. M., Fuentes, S., Hesketh, J., Hill, M. S., Innocenti, P., Morrow, E. H., Fowler, K., &  
494 Reuter, M. (2016). Rapid evolution of the intersexual genetic correlation for fitness in  
495 *Drosophila melanogaster*. *Evolution*. <https://doi.org/10.1111/evo.12892>
- 496 Connallon, T., & Clark, A. G. (2013). Evolutionary inevitability of sexual antagonism.  
497 *Proceedings of the Royal Society B: Biological Sciences*.  
498 <https://doi.org/10.1098/rspb.2013.2123>
- 499 Connallon, T., & Matthews, G. (2019). Cross-sex genetic correlations for fitness and fitness  
500 components: Connecting theoretical predictions to empirical patterns. *Evolution Letters*.  
501 <https://doi.org/10.1002/evl3.116>
- 502 Crudgington, H. S., Fellows, S., & Snook, R. R. (2010). Increased opportunity for sexual conflict  
503 promotes harmful males with elevated courtship frequencies. *Journal of Evolutionary*  
504 *Biology*. <https://doi.org/10.1111/j.1420-9101.2009.01907.x>

- 505 Culumber, Z. W., Engel, N., Travis, J., & Hughes, K. A. (2020). Larger female brains do not  
506 reduce male sexual coercion. *Animal Behaviour*.  
507 <https://doi.org/10.1016/j.anbehav.2019.11.018>
- 508 Daupagne, L., & Koene, J. M. (2020). Disentangling female postmating responses induced by  
509 semen transfer components in a simultaneous hermaphrodite. *Animal Behaviour*.  
510 <https://doi.org/10.1016/j.anbehav.2020.06.009>
- 511 Delcourt, M., Blows, M. W., & Rundle, H. D. (2009). Sexually antagonistic genetic variance for  
512 fitness in an ancestral and a novel environment. *Proceedings of the Royal Society B:  
513 Biological Sciences*. <https://doi.org/10.1098/rspb.2008.1459>
- 514 Delph, L. F., Andicoechea, J., Steven, J. C., Herlihy, C. R., Scarpino, S. V., & Bell, D. L. (2011).  
515 Environment-dependent intralocus sexual conflict in a dioecious plant. *New Phytologist*.  
516 <https://doi.org/10.1111/j.1469-8137.2011.03811.x>
- 517 Demont, M., Grazer, V. M., Michalczyk, Ł., Millard, A. L., Sbilordo, S. H., Emerson, B. C.,  
518 Gage, M. J. G., & Martin, O. Y. (2014). Experimental Removal of Sexual Selection  
519 Reveals Adaptations to Polyandry in Both Sexes. *Evolutionary Biology*.  
520 <https://doi.org/10.1007/s11692-013-9246-3>
- 521 Dougherty, L. R., van Lieshout, E., McNamara, K. B., Moschilla, J. A., Arnqvist, G., &  
522 Simmons, L. W. (2017). Sexual conflict and correlated evolution between male  
523 persistence and female resistance traits in the seed beetle *Callosobruchus maculatus*.  
524 *Proceedings of the Royal Society B: Biological Sciences*.  
525 <https://doi.org/10.1098/rspb.2017.0132>
- 526 Dutoit, L., Mugal, C. F., Bolívar, P., Wang, M., Nadachowska-Brzyska, K., Smeds, L., Yazdi, H.  
527 P., Gustafsson, L., & Ellegren, H. (2018). Sex-biased gene expression, sexual antagonism



- 528 and levels of genetic diversity in the collared flycatcher (*Ficedula albicollis*) genome.  
529 *Molecular Ecology*. <https://doi.org/10.1111/mec.14789>
- 530 Eyer, P. A., Blumenfeld, A. J., & Vargo, E. L. (2019). Sexually antagonistic selection promotes  
531 genetic divergence between males and females in an ant. *Proceedings of the National*  
532 *Academy of Sciences of the United States of America*.  
533 <https://doi.org/10.1073/pnas.1906568116>
- 534 Filice, D. C. S., & Long, T. A. F. (2016). Genetic variation in male-induced harm in *Drosophila*  
535 *melanogaster*. *Biology Letters*. <https://doi.org/10.1098/rsbl.2016.0105>
- 536 Fowler, K., & Partridge, L. (1989). A cost of mating in female fruitflies. *Nature*.  
537 <https://doi.org/10.1038/338760a0>
- 538 Gavrilets, S., Arnqvist, G., & Friberg, U. (2001). The evolution of female mate choice by sexual  
539 conflict. *Proceedings of the Royal Society B: Biological Sciences*.  
540 <https://doi.org/10.1098/rspb.2000.1382>
- 541 Gay, L., Hosken, D. J., Eady, P., Vasudev, R., & Tregenza, T. (2011). The evolution of harm-  
542 effect of sexual conflicts and population size. *Evolution*. [https://doi.org/10.1111/j.1558-](https://doi.org/10.1111/j.1558-5646.2010.01181.x)  
543 [5646.2010.01181.x](https://doi.org/10.1111/j.1558-5646.2010.01181.x)
- 544 Hadfield, J. D. (2010). MCMC methods for multi-response generalized linear mixed models: The  
545 MCMCglmm R package. *Journal of Statistical Software*.  
546 <https://doi.org/10.18637/jss.v033.i02>
- 547 Hall, J. C. (1994). The mating of a fly. *Science*. <https://doi.org/10.1126/science.8209251>
- 548 Holland, B., & Rice, W. R. (1999). Experimental removal of sexual selection reverses  
549 intersexual antagonistic coevolution and removes a reproductive load. *Proceedings of the*

- 550 *National Academy of Sciences of the United States of America.*  
551 <https://doi.org/10.1073/pnas.96.9.5083>
- 552 Holman, L., & Jacomb, F. (2017). The effects of stress and sex on selection, genetic covariance,  
553 and the evolutionary response. *Journal of Evolutionary Biology.*  
554 <https://doi.org/10.1111/jeb.13149>
- 555 Hosken, D. J., Garner, T. W. J., & Ward, P. I. (2001). Sexual conflict selects for male and female  
556 reproductive characters. *Current Biology.* [https://doi.org/10.1016/S0960-9822\(01\)00146-](https://doi.org/10.1016/S0960-9822(01)00146-4)  
557 4
- 558 Innocenti, P., & Morrow, E. H. (2010). The sexually antagonistic genes of drosophila  
559 melanogaster. *PLoS Biology.* <https://doi.org/10.1371/journal.pbio.1000335>
- 560 Janicke, T., & Morrow, E. H. (2018). Operational sex ratio predicts the opportunity and direction  
561 of sexual selection across animals. In *Ecology Letters.* <https://doi.org/10.1111/ele.12907>
- 562 Jordan, K. W., Morgan, T. J., & Mackay, T. F. C. (2006). Quantitative trait loci for locomotor  
563 behavior in *Drosophila melanogaster.* *Genetics.*  
564 <https://doi.org/10.1534/genetics.106.058099>
- 565 Kidwell, J. F., Clegg, M. T., Stewart, F. M., & Prout, T. (1977). Regions of stable equilibria for  
566 models of differential selection in the two sexes under random mating. *Genetics.*
- 567 Lankinen, Å., Hydbom, S., & Strandh, M. (2017). Sexually antagonistic evolution caused by  
568 male–male competition in the pistil. *Evolution.* <https://doi.org/10.1111/evo.13329>
- 569 Lankinen, Å., Smith, H. G., Andersson, S., & Madjidian, J. A. (2016). Selection on pollen and  
570 pistil traits during pollen competition is affected by both sexual conflict and mixed  
571 mating in a self-compatible herb. *American Journal of Botany.*  
572 <https://doi.org/10.3732/ajb.1500148>

- 573 Linder, J. E., & Rice, W. R. (2005). Natural selection and genetic variation for female resistance  
574 to harm from males. *Journal of Evolutionary Biology*. <https://doi.org/10.1111/j.1420->  
575 [9101.2004.00872.x](https://doi.org/10.1111/j.1420-9101.2004.00872.x)
- 576 Long, T. A. F., Agrawal, A. F., & Rowe, L. (2012). The effect of sexual selection on offspring  
577 fitness depends on the nature of genetic variation. *Current Biology*.  
578 <https://doi.org/10.1016/j.cub.2011.12.020>
- 579 Long, T. A. F., & Rice, W. R. (2007). Adult locomotory activity mediates intralocus sexual  
580 conflict in a laboratory-adapted population of *Drosophila melanogaster*. *Proceedings of*  
581 *the Royal Society B: Biological Sciences*. <https://doi.org/10.1098/rspb.2007.1140>
- 582 Lonn, E., Koskela, E., Mappes, T., Mokka, M., Sims, A. M., & Watts, P. C. (2017).  
583 Balancing selection maintains polymorphisms at neurogenetic loci in field experiments.  
584 *Proceedings of the National Academy of Sciences of the United States of America*.  
585 <https://doi.org/10.1073/pnas.1621228114>
- 586 Lund-Hansen, K. K., Abbott, J. K., & Morrow, E. H. (2020). Feminization of complex traits in  
587 *Drosophila melanogaster* via female-limited X chromosome evolution. *Evolution*.  
588 <https://doi.org/10.1111/evo.14021>
- 589 Macke, E., Olivieri, I., & Magalhães, S. (2014). Local mate competition mediates sexual conflict  
590 over sex ratio in a haplodiploid spider mite. *Current Biology*.  
591 <https://doi.org/10.1016/j.cub.2014.10.040>
- 592 Martinossi-Allibert, I., Savković, U., Đorđević, M., Arnqvist, G., Stojković, B., & Berger, D.  
593 (2018). The consequences of sexual selection in well-adapted and maladapted  
594 populations of bean beetles†. *Evolution*. <https://doi.org/10.1111/evo.13412>

- 595 McNamara, J. M., & Wolf, M. (2015). Sexual conflict over parental care promotes the evolution  
596 of sex differences in care and the ability to care. *Proceedings of the Royal Society B:*  
597 *Biological Sciences*. <https://doi.org/10.1098/rspb.2014.2752>
- 598 McNamara, K. B., Sloan, N. S., Kershaw, S. E., van Lieshout, E., & Simmons, L. W. (2020).  
599 Males evolve to be more harmful under increased sexual conflict intensity in a seed  
600 beetle. *Behavioral Ecology*. <https://doi.org/10.1093/beheco/arz186>
- 601 Michalczyk, L., Millard, A. L., Martin, O. Y., Lumley, A. J., Emerson, B. C., & Gage, M. J. G.  
602 (2011). Experimental evolution exposes female and male responses to sexual selection  
603 and conflict in *tribolium castaneum*. *Evolution*. [https://doi.org/10.1111/j.1558-](https://doi.org/10.1111/j.1558-5646.2010.01174.x)  
604 [5646.2010.01174.x](https://doi.org/10.1111/j.1558-5646.2010.01174.x)
- 605 Mobley, K. B., Granroth-Wilding, H., Ellmén, M., Orell, P., Erkinaro, J., & Primmer, C. R.  
606 (2020). Time spent in distinct life history stages has sex-specific effects on reproductive  
607 fitness in wild Atlantic salmon. *Molecular Ecology*. <https://doi.org/10.1111/mec.15390>
- 608 Nandy, B. (2012). Of War and Love: A Study of Sexual Conflict and Sexual Selection Using  
609 *Drosophila melanogaster* Laboratory System Bodhisatta Nandy. *IISER Mohali (PhD*  
610 *Thesis), December*.
- 611 Nandy, B., Chakraborty, P., Gupta, V., Ali, S. Z., & Prasad, N. G. (2013). Sperm Competitive  
612 Ability Evolves In Response To Experimental Alteration Of Operational Sex Ratio.  
613 *Evolution*. <https://doi.org/10.1111/evo.12076>
- 614 Nandy, B., Gupta, V., Sen, S., Udaykumar, N., Samant, M. A., Ali, S. Z., & Prasad, N. G.  
615 (2013a). Evolution of mate-harm, longevity and behaviour in male fruit flies subjected to  
616 different levels of interlocus conflict. *BMC Evolutionary Biology*, *13*(1).  
617 <https://doi.org/10.1186/1471-2148-13-212>

- 618 Nandy, B., Gupta, V., Sen, S., Udaykumar, N., Samant, M. A., Ali, S. Z., & Prasad, N. G.  
619 (2013b). Evolution of mate-harm, longevity and behaviour in male fruit flies subjected to  
620 different levels of interlocus conflict. *BMC Evolutionary Biology*.  
621 <https://doi.org/10.1186/1471-2148-13-212>
- 622 Nandy, B., Gupta, V., Udaykumar, N., Samant, M. A., Sen, S., & Prasad, N. G. (2014).  
623 Experimental evolution of female traits under different levels of intersexual conflict in  
624 *Drosophila melanogaster*. *Evolution*, 68(2). <https://doi.org/10.1111/evo.12271>
- 625 Nandy, B., Joshi, A., Ali, Z. S., Sen, S., & Prasad, N. G. (2012). Degree of adaptive male mate  
626 choice is positively correlated with female quality variance. *Scientific Reports*.  
627 <https://doi.org/10.1038/srep00447>
- 628 Parker, G. A. (1979). SEXUAL SELECTION AND SEXUAL CONFLICT. In *Sexual Selection*  
629 *and Reproductive Competition in Insects*. [https://doi.org/10.1016/b978-0-12-108750-](https://doi.org/10.1016/b978-0-12-108750-0.50010-0)  
630 [0.50010-0](https://doi.org/10.1016/b978-0-12-108750-0.50010-0)
- 631 Parker, K., Roessingh, P., & Menken, S. B. J. (2013). Cost of mating in *Drosophila melanogaster*  
632 females is mediated by male accessory gland products. *Journal of Insect Behavior*.  
633 [https://doi.org/10.1016/S0003-3472\(05\)81016-4](https://doi.org/10.1016/S0003-3472(05)81016-4)
- 634 Partridge, L., & Fowler, K. (1990). Non-mating costs of exposure to males in female *Drosophila*  
635 *melanogaster*. *Journal of Insect Physiology*. [https://doi.org/10.1016/0022-](https://doi.org/10.1016/0022-1910(90)90059-O)  
636 [1910\(90\)90059-O](https://doi.org/10.1016/0022-1910(90)90059-O)
- 637 Partridge, L., Hoffmann, A., & Jones, J. S. (1987). Male size and mating success in *Drosophila*  
638 *melanogaster* and *D. pseudoobscura* under field conditions. *Animal Behaviour*.  
639 [https://doi.org/10.1016/S0003-3472\(87\)80272-5](https://doi.org/10.1016/S0003-3472(87)80272-5)

- 640 Patlar, B., Weber, M., Temizyürek, T., & Ramm, S. A. (2020). Seminal Fluid-Mediated  
641 Manipulation of Post-mating Behavior in a Simultaneous Hermaphrodite. *Current*  
642 *Biology*. <https://doi.org/10.1016/j.cub.2019.11.018>
- 643 Pennell, T. M., De Haas, F. J. H., Morrow, E. H., & Van Doorn, G. S. (2016). Contrasting effects  
644 of intralocus sexual conflict on sexually antagonistic coevolution. *Proceedings of the*  
645 *National Academy of Sciences of the United States of America*.  
646 <https://doi.org/10.1073/pnas.1514328113>
- 647 Pennell, T. M., & Morrow, E. H. (2013). Two sexes, one genome: The evolutionary dynamics of  
648 intralocus sexual conflict. *Ecology and Evolution*. <https://doi.org/10.1002/ece3.540>
- 649 Prasad, N. G., Bedhomme, S., Day, T., & Chippindale, A. K. (2007). An evolutionary cost of  
650 separate genders revealed by male-limited evolution. *American Naturalist*.  
651 <https://doi.org/10.1086/509941>
- 652 Price, D. K., & Burley, N. T. (1994). Constraints on the evolution of attractive traits: Selection in  
653 male and female zebra finches. *American Naturalist*. <https://doi.org/10.1086/285718>
- 654 Punzalan, D., Delcourt, M., & Rundle, H. D. (2014). Comparing the intersex genetic correlation  
655 for fitness across novel environments in the fruit fly, *Drosophila serrata*. *Heredity*.  
656 <https://doi.org/10.1038/hdy.2013.85>
- 657 Rice, W. R. (1996). Sexually antagonistic male adaptation triggered by experimental arrest of  
658 female evolution. *Nature*. <https://doi.org/10.1038/381232a0>
- 659 Rice, W. R., Linder, J. E., Friberg, U., Lew, T. A., Morrow, E. H., & Stewart, A. D. (2005).  
660 Inter-locus antagonistic coevolution as an engine of speciation: Assessment with  
661 hemiclinal analysis. *Proceedings of the National Academy of Sciences of the United*  
662 *States of America*. <https://doi.org/10.1073/pnas.0501889102>

- 663 Rowe, Cameron, & Day. (2005). Escalation, Retreat, and Female Indifference as Alternative  
664 Outcomes of Sexually Antagonistic Coevolution. *The American Naturalist*.  
665 <https://doi.org/10.2307/3473527>
- 666 Ruzicka, F., Hill, M. S., Pennell, T. M., Flis, I., Ingleby, F. C., Mott, R., Fowler, K., Morrow, E.  
667 H., & Reuter, M. (2019). Genome-wide sexually antagonistic variants reveal long-  
668 standing constraints on sexual dimorphism in fruit flies. *PLoS Biology*.  
669 <https://doi.org/10.1371/journal.pbio.3000244>
- 670 Sakaluk, S. K., Duffield, K. R., Rapkin, J., Sadd, B. M., & Hunt, J. (2019). The troublesome gift:  
671 The spermatophylax as a purveyor of sexual conflict and coercion in crickets. In  
672 *Advances in the Study of Behavior*. <https://doi.org/10.1016/bs.asb.2018.12.001>
- 673 Schenkel, M. A., Pen, I., Beukeboom, L. W., & Billeter, J. C. (2018). Making sense of intralocus  
674 and interlocus sexual conflict. In *Ecology and Evolution*.  
675 <https://doi.org/10.1002/ece3.4629>
- 676 Sharp, N. P., & Vincent, C. M. (2015). The effect of parasites on sex differences in selection.  
677 *Heredity*. <https://doi.org/10.1038/hdy.2014.110>
- 678 Sirot, L. K., Wong, A., Chapman, T., & Wolfner, M. F. (2015). Sexual conflict and seminal fluid  
679 proteins: A dynamic landscape of sexual interactions. *Cold Spring Harbor Perspectives*  
680 *in Biology*. <https://doi.org/10.1101/cshperspect.a017533>
- 681 Stulp, G., Kuijper, B., Buunk, A. P., Pollet, T. V., & Verhulst, S. (2012). Intralocus sexual  
682 conflict over human height. *Biology Letters*. <https://doi.org/10.1098/rsbl.2012.0590>
- 683 Svensson, E. I., McAdam, A. G., & Sinervo, B. (2009). Intralocus sexual conflict over immune  
684 defense, gender load, and sex-specific signaling in a natural lizard population. *Evolution*.  
685 <https://doi.org/10.1111/j.1558-5646.2009.00782.x>

- 686 Swart, E. M., Starkloff, N. C., Ypenburg, S., Ellers, J., van Straalen, N. M., & Koene, J. M.  
687 (2020). The effect of mating on female reproduction across hermaphroditic freshwater  
688 snails. *Invertebrate Biology*, *139*(1), 1–12. <https://doi.org/10.1111/ivb.12275>
- 689 Székely, T. (2014). Sexual Conflict Between Parents: Offspring Desertion and Asymmetrical  
690 Parental Care. *Cold Spring Harbor Perspectives in Biology*.  
691 <https://doi.org/10.1101/cshperspect.a017665>
- 692 Tilszer, M., Antoszczyk, K., Sałek, N., Zając, E., & Radwan, J. (2006). EVOLUTION UNDER  
693 RELAXED SEXUAL CONFLICT IN THE BULB MITE RHIZOGLYPHUS ROBINI.  
694 *Evolution*. <https://doi.org/10.1554/06-060.1>
- 695 Tompkins, L., Gross, A. C., Hall, J. C., Gailey, D. A., & Siegel, R. W. (1982). The role of female  
696 movement in the sexual behavior of *Drosophila melanogaster*. *Behavior Genetics*.  
697 <https://doi.org/10.1007/BF01067849>
- 698 van Dijken, F. R., & Scharloo, W. (1979). Divergent selection on locomotor activity in  
699 *Drosophila melanogaster*. II. Test for reproductive isolation between selected lines.  
700 *Behavior Genetics*. <https://doi.org/10.1007/BF01067351>
- 701 Vincent, C. M., & Sharp, N. P. (2014). Sexual antagonism for resistance and tolerance to  
702 infection in *Drosophila melanogaster*. *Proceedings of the Royal Society B: Biological*  
703 *Sciences*. <https://doi.org/10.1098/rspb.2014.0987>
- 704 Wigby, S., & Chapman, T. (2004). Female resistance to male harm evolves in response to  
705 manipulation of sexual conflict. *Evolution*. [https://doi.org/10.1111/j.0014-](https://doi.org/10.1111/j.0014-3820.2004.tb00436.x)  
706 [3820.2004.tb00436.x](https://doi.org/10.1111/j.0014-3820.2004.tb00436.x)
- 707 Wigby, S., & Chapman, T. (2005). Sex peptide causes mating costs in female *Drosophila*  
708 *melanogaster*. *Current Biology*. <https://doi.org/10.1016/j.cub.2005.01.051>



709 Wilson, C. J., & Tomkins, J. L. (2014). Countering counteradaptations: Males hijack control of  
 710 female kicking behavior. *Behavioral Ecology*. <https://doi.org/10.1093/beheco/aru022>  
 711 Wright, A. E., Fumagalli, M., Cooney, C. R., Bloch, N. I., Vieira, F. G., Buechel, S. D., Kolm,  
 712 N., & Mank, J. E. (2018). Male-biased gene expression resolves sexual conflict through  
 713 the evolution of sex-specific genetic architecture. *Evolution Letters*.  
 714 <https://doi.org/10.1002/evl3.39>  
 715

716

717 **Table 1.** ANOVA-like table for random terms in the linear mixed effects model for male and  
 718 female fitness

|                            | npar | logLik  | AIC    | LRT    | Df | p value           |
|----------------------------|------|---------|--------|--------|----|-------------------|
| <none>                     | 9    | -1861.4 | 3740.9 |        |    |                   |
| (1   Family)               | 8    | -1864   | 3744   | 5.114  | 1  | <b>0.0237</b>     |
| (1   Family:Sex)           | 8    | -1878   | 3772   | 33.147 | 1  | <b>&lt;0.0001</b> |
| (1   Family:Sex:Ratio)     | 8    | -1861.5 | 3738.9 | 0.052  | 1  | 0.8196            |
| (1   Family:Sex:Sex:Ratio) | 8    | -1868.2 | 3752.3 | 13.479 | 1  | <b>0.0002</b>     |

719

720 **Table 2.** The summary of results from A) the analysis using hemigenome line averages and B)  
 721 the MCMCglmm model. Lower and upper CL represent the limits of 95% confidence  
 722 intervals.

| A) Using Line Averages                                          |               |          |          |          |
|-----------------------------------------------------------------|---------------|----------|----------|----------|
|                                                                 | Sex Ratio     | Estimate | Lower CL | Upper CL |
| Intersexual genetic correlation for fitness<br>( $r_{w,g,mf}$ ) | Male Biased   | 0.3805   | 0.2992   | 0.5283   |
|                                                                 | Equal         | 0.4027   | 0.3140   | 0.5526   |
|                                                                 | Female Biased | 0.2515   | 0.1198   | 0.4502   |
| Proportion of sexually antagonistic fitness variation (AI)      | Male Biased   | 0.3097   | 0.2358   | 0.3504   |
|                                                                 | Equal         | 0.2986   | 0.2237   | 0.3430   |
|                                                                 | Female Biased | 0.3742   | 0.2749   | 0.4401   |

|                                                                     | Pairs of Sex Ratios         | Estimate | Lower CL | Upper CL |
|---------------------------------------------------------------------|-----------------------------|----------|----------|----------|
| Genetic correlations for female fitness between pairs of sex ratios | Male Biased - Female Biased | 0.7688   | 0.7442   | 0.8497   |
|                                                                     | Male Biased - Equal         | 0.7493   | 0.7213   | 0.8368   |
|                                                                     | Female Biased - Equal       | 0.8421   | 0.8403   | 0.8956   |
|                                                                     | Pairs of Sex Ratios         | Estimate | Lower CL | Upper CL |
| Genetic correlations for male fitness between pairs of sex ratios   | Male Biased - Female Biased | 0.5567   | 0.4997   | 0.7262   |
|                                                                     | Male Biased - Equal         | 0.6995   | 0.6755   | 0.8018   |
|                                                                     | Female Biased - Equal       | 0.5415   | 0.4664   | 0.7417   |
| B) Using MCMCglmm                                                   |                             |          |          |          |
|                                                                     | Sex Ratio                   | Estimate | Lower CL | Upper CL |
| Intersexual genetic correlation for fitness ( $r_{w,g,mf}$ )        | Male Biased                 | 0.5056   | 0.1418   | 0.7983   |
|                                                                     | Equal                       | 0.4999   | 0.1397   | 0.7787   |
|                                                                     | Female Biased               | 0.4462   | 0.0059   | 0.8470   |
| Female Heritability ( $h_{w,f}^2$ )                                 | Male Biased                 | 0.8702   | 0.5935   | 1.1520   |
|                                                                     | Equal                       | 0.9992   | 0.7337   | 1.2696   |
|                                                                     | Female Biased               | 0.7385   | 0.5021   | 1.0539   |
| Male Heritability ( $h_{w,m}^2$ )                                   | Male Biased                 | 0.4788   | 0.2383   | 0.7303   |
|                                                                     | Equal                       | 0.5762   | 0.3192   | 0.8637   |
|                                                                     | Female Biased               | 0.2229   | 0.0495   | 0.4080   |
|                                                                     | Pairs of Sex Ratios         | Estimate | Lower CL | Upper CL |
| Genetic correlations for female fitness between pairs of sex ratios | Male Biased - Female Biased | 0.8932   | 0.6888   | 0.9996   |
|                                                                     | Male Biased - Equal         | 0.8785   | 0.7477   | 0.9994   |
|                                                                     | Female Biased - Equal       | 0.9536   | 0.8767   | 0.9995   |
|                                                                     | Pairs of Sex Ratios         | Estimate | Lower CL | Upper CL |
| Genetic correlations for male fitness between pairs of sex ratios   | Male Biased - Female Biased | 0.8932   | 0.6888   | 0.9996   |
|                                                                     | Male Biased - Equal         | 0.9438   | 0.8190   | 1.0000   |
|                                                                     | Female Biased - Equal       | 0.9010   | 0.7025   | 0.9997   |

723

724

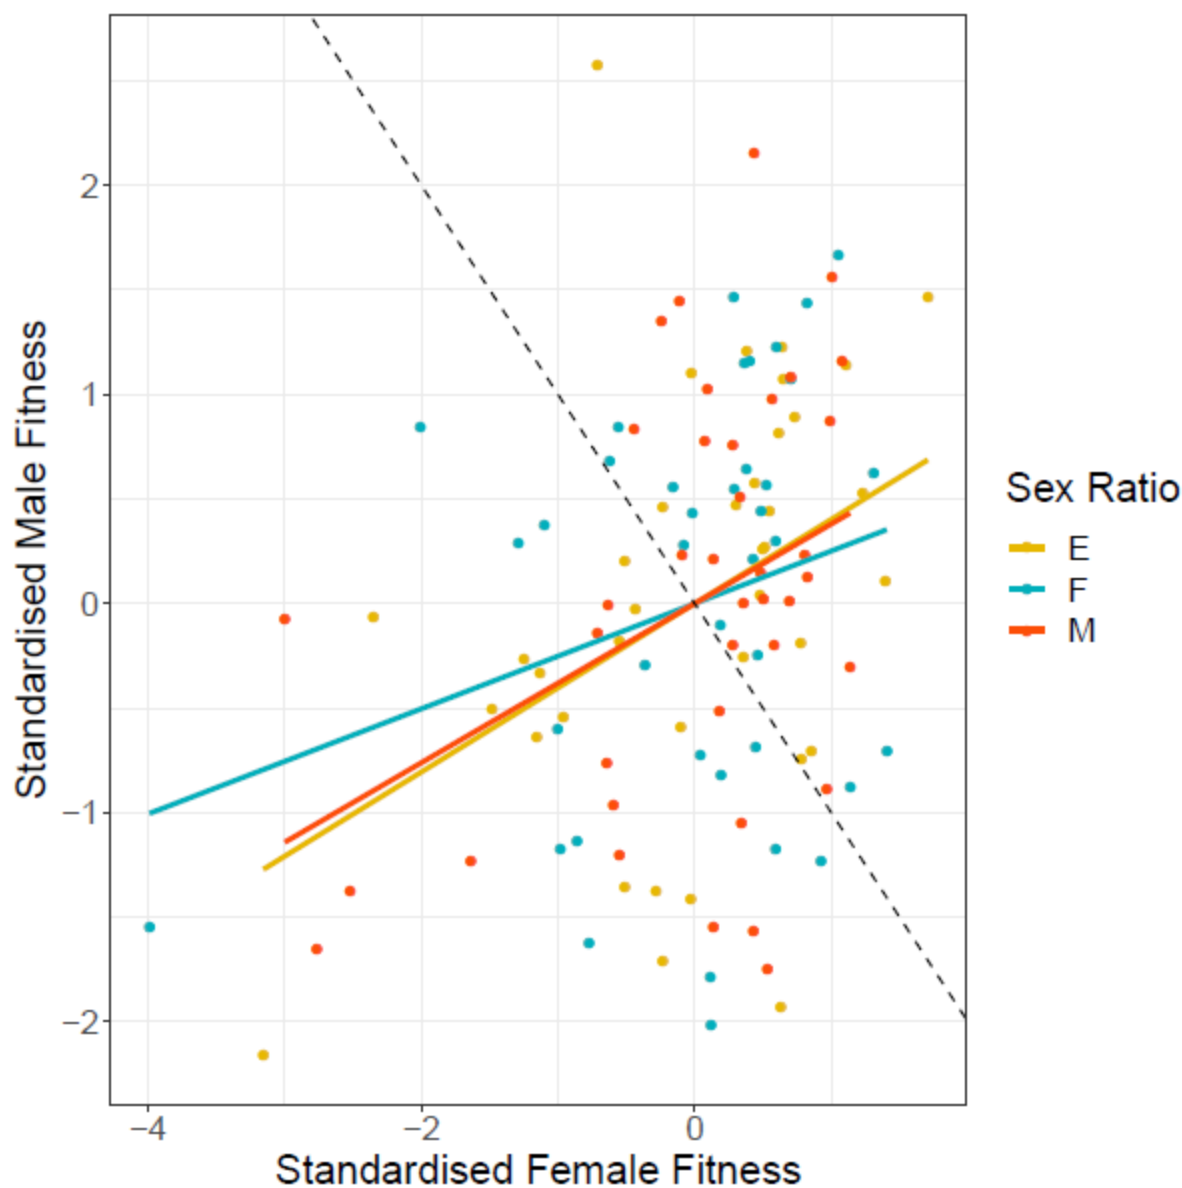

725

726 **Figure 1.** Scaled and centred male and female fitnesses for each of the 39 hemigenome lines for  
727 equal sex-ratio (E, yellow), female-biased sex ratio (F, blue) and male-biased sex-ratio (M,  
728 red). The solid lines represent the least-squared regression lines for each of the three sex-  
729 ratios. The dashed line represents the axis of sexually antagonistic fitness variation with  
730 male-beneficial, female detrimental genotypes to the top-left and female-beneficial, male  
731 detrimental genotypes to the bottom-right.

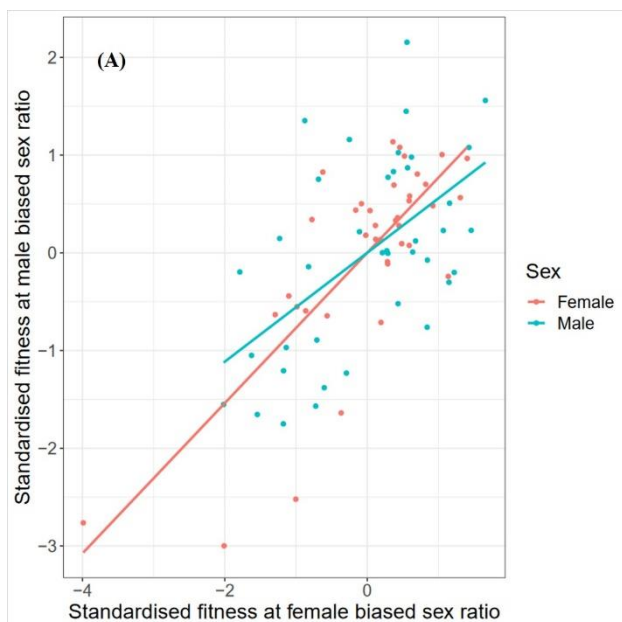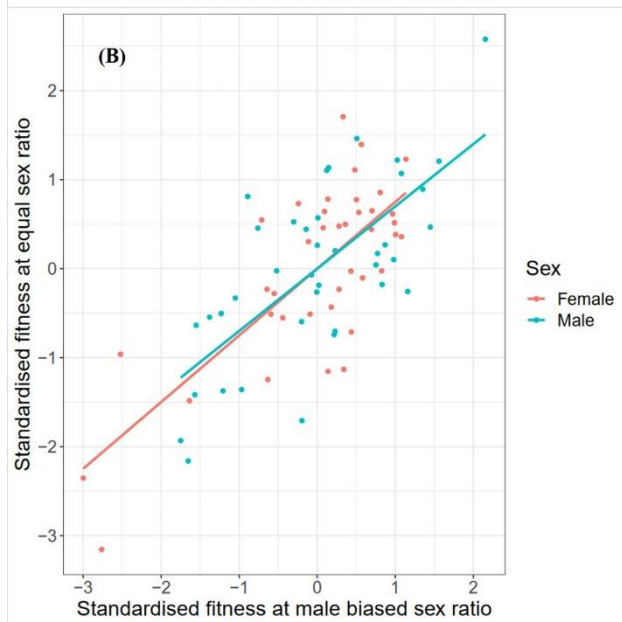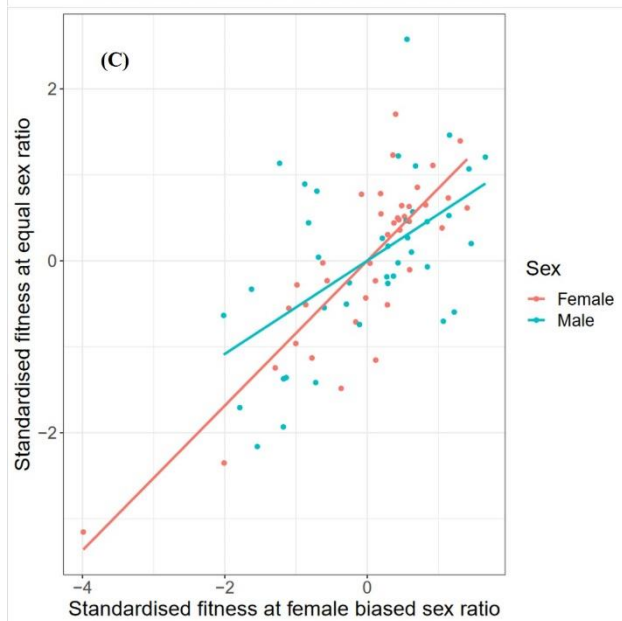

733 **Figure 2.** Scatterplots showing standardised male and female fitnesses for various hemigenome  
734 lines between (A) male biased and female biased sex ratios, (B) equal and male biased sex ratios,  
735 and (C) equal and female biased sex ratios. Blue represents data for males, and red represents  
736 data for females. The solid lines represent least-squared regression lines.

737

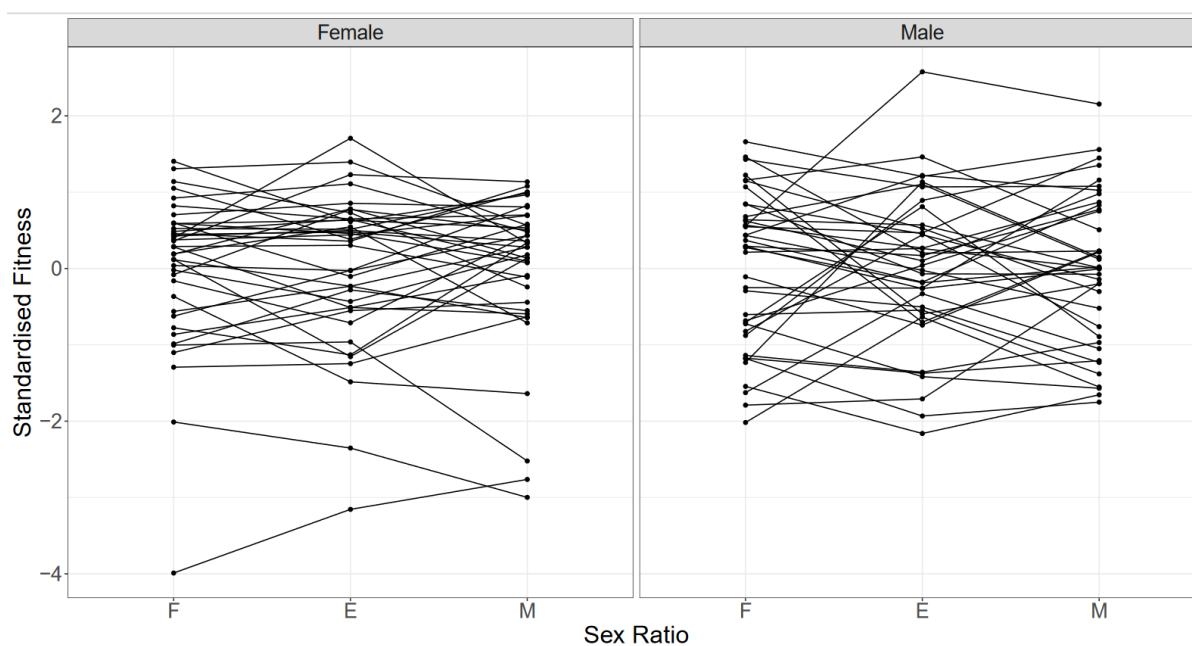

739 **Figure 3.** Interaction plots showing standardized fitnesses for various hemigenome lines at  
740 female biased (F), equal (E), and male biased (M) sex ratios for females and males. Points  
741 connected by a line represent a hemigenome line.

742

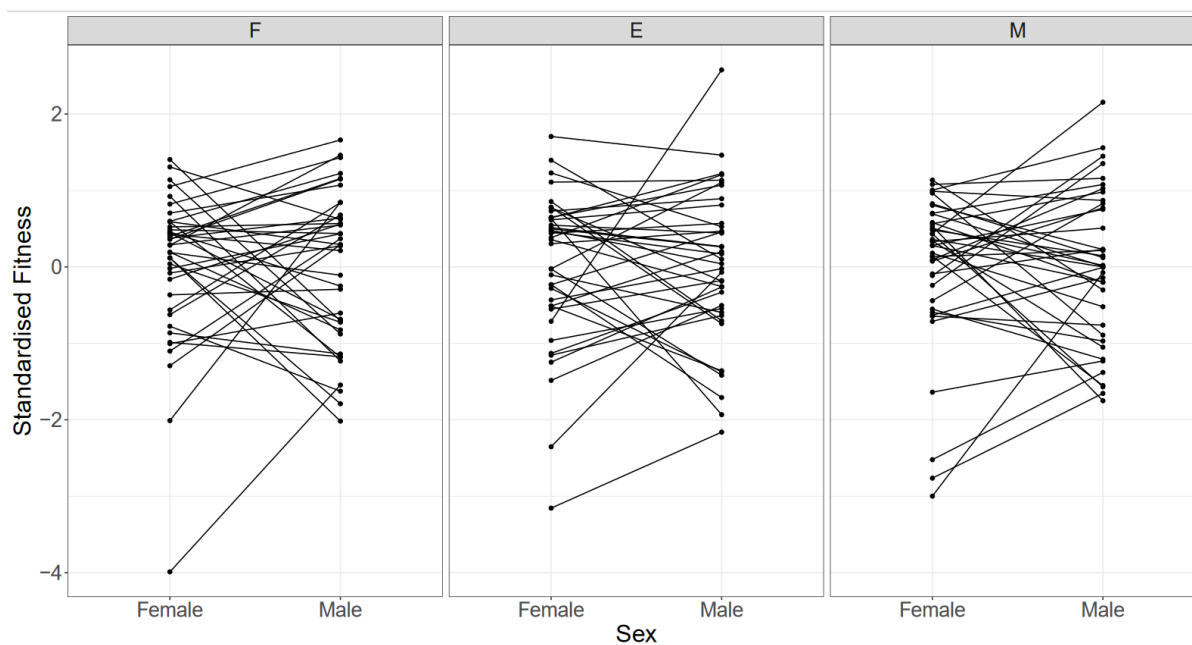

743

744 **Figure 4.** Interaction plots showing standardized fitness for various hemigenome lines for  
745 females and males, at female biased (F), equal (E), and male biased (M) sex ratios. Points  
746 connected by a line represent a hemigenome line.

747

748
